# Supplementary material
Source: HighWire-hosted journal article supplement (https://ejhp.bmj.com/content/ejhpharm-2018-001571)
Supplement: inline-supplementary-material-1 [file inline-supplementary-material-1.docx]

**Résumé**

**Introduction**

Selon les fabricants, la solution diluée d’étoposide ne doit pas dépasser une concentration de 0.4 mg/mL à cause d’un risque de précipitation. Pour des fortes doses ou pour des patients nécessitant une restriction hydrique, l’étoposide phosphate peut être proposé en alternative cependant ce produit est fréquemment contingenté. L’objectif de ce travail est d’étudier la stabilité de solutions d’étoposide entre 0.38 et 1.75 mg/mL, diluées dans des poches en polyoléfine de chlorure de sodium 0,9% (NaCl 0,9%) ou du glucose 5% (G5%), conservées à 25°C ou entre 2-8°C, pendant 61 jours. Cette étude observe également l’impact d’une pompe à perfusion sur la stabilité physique et chimique des solutions d’étoposide.

**Méthodes**

La stabilité chimique a été analysée à J0, J9, J16, J21, J28 et J61 par chromatographie liquide haute performance. La stabilité physique a été évaluée par un examen visuel et subvisuel. L’action de la pompe à perfusion a été évaluée à J61.

**Résultats**

Les solutions d’étoposide diluées à 0.38, 0.74 et 1.26 mg/mL dans du G5% et conservées à 25°C sont stables pendant 61 jours et pendant 28 jours à 1.75 mg/mL. Dans le NaCl 0.9%, l’étoposide était moins stable avec plus de précipitations. L’action de la pompe à perfusion n’a pas causé de modifications physiques.

**Conclusion**

La conservation à 25°C et l’utilisation du G5% comme solvant sont recommandées pour les fortes concentrations d’étoposide, avec 61 jours de stabilité jusqu’à 1.26 mg/mL et 28 jours de stabilité jusqu’à 1.75 mg/mL. Comme précaution, l’utilisation d’un perfuseur avec filtre est tout de même recommandée. La conservation entre 2-8°C et l’utilisation du NaCl 0.9% comme solvant augmentent le risque de précipitation.
